# Supplementary material
Source: publisher figshare collection journal article supplement (https://asha.figshare.com/articles/dataset/_/23290055)
Supplement: Supplementary file 1 [file 1]

**Supplemental Material S1.** Examples of studies addressing bilingual English-speaking children's speech acquisition.

|     | Languages spoken                       | Author (year)                    | Language(s) assessed                          | Country      | No. of participants | Children (age range)             | Adults | Data                                       | Typical/SSD                     |
|-----|----------------------------------------|----------------------------------|-----------------------------------------------|--------------|---------------------|----------------------------------|--------|--------------------------------------------|---------------------------------|
| 1.  | Afrikaans-English and isiXhosa-English | Pascoe, Mahura, & Le Roux (2018) | South African English                         | South Africa | 308                 | 3;0–5;11                         | -      | C, V, PCC, PVC, PhonP                      | TD (SSD)                        |
| 2.  | Akan-English                           | Kpogo & Gathercole (2020)        | Akan English                                  | USA          | 45                  | 10–64 years                      |        | inter-dental fricatives                    | TD                              |
| 3.  | Arabic-English                         | Sabri & Fabiano-Smith, (2018)    | Arabic English                                | USA          | 1                   | 3;6–4;4 years longitudinal       | -      | PCC, PVC, C, V, PhonP                      | Hearing loss (cochlear implant) |
| 4.  | Cantonese-English                      | Holm & Dodd (1999a)              | Cantonese and English                         | Australia    | 2                   | 2;3–3;1 and 2;9–3;5 longitudinal | -      | C, PhonP                                   | TD                              |
| 5.  | Farsi-English                          | Keshavarz & Ingram (2002)        | Farsi and English                             | Iran/UK?     | 1                   | 24 months longitudinal           | -      | Vocabulary, prosody                        | TD                              |
| 6.  | Fiji English                           | McAlister, McLeod & Hopf (2021)  | Fijian or Fiji Hindi dialects of Fiji English | Fiji         | 72                  | 5–10 years                       | -      | C, PCC, PhonP                              | TD (SSD)                        |
| 7.  | French-English                         | Brulard & Carr (2003)            | French/English                                | France       | 1                   | 1;10–2;6 longitudinal            | -      | word types                                 | Late talker                     |
| 8.  | Haitian Creole-English                 | Yavaş & Beaubrun (2006)          | Haitian Creole-English                        | USA?         | 40                  | 3;1–4;11                         | -      | CC                                         | TD                              |
| 9.  | Italian-English                        | Holm & Dodd (1999b)              | Italian and English                           | UK?          | 2                   | 3;8, 4;4                         | -      | C, PhonP                                   | (SSD)                           |
| 10. | Japanese-English                       | Preston & Seki (2011)            | Japanese English                              | Japan/USA?   | 1                   | 11;4                             | -      | Intelligibility, C, phonological awareness | TD                              |

|     |                   |                                      |                                      |                |                             |                                     |           |                             |    |
|-----|-------------------|--------------------------------------|--------------------------------------|----------------|-----------------------------|-------------------------------------|-----------|-----------------------------|----|
| 11. | Korean-English    | Baker & Trofimovich (2005)           | Korean and English                   | Korea and USA? | 80 (40 children, 40 adults) | 10–16 years                         | 40 adults | V                           | TD |
| 12. | Korean-English    | Kim et al. (2018)                    | Korean and English                   | New Zealand    | 16                          | 3;1–5;11 years                      | -         | C, PhonP                    | TD |
| 13. | Malaysian-English | Phoon, Abdullah, & MacLagan (2012)   | Chinese-influenced Malaysian English | Malaysia       | 264                         | 3–7 years                           | -         | PCC; PVC; PCCC; PPC         | TD |
| 14. | Mandarin-English  | En, Brebner, & McCormack (2014)      | English                              | Singapore      | 70                          | 4;0–4;5 years                       | -         | C, PhonP                    | TD |
| 15. | Mandarin-English  | Lin & Johnson (2010)                 | Mandarin and English                 | Taiwan         | 48                          | 5 years                             | -         | C, V, PhonP                 | TD |
| 16. | Norwegian-English | Johnson & Lancaster (1998)           | Norwegian and English                | Canada         | 1                           | birth to 2 years longitudinal       | -         | Lexicon, phonology, prosody | TD |
| 17. | Russian-English   | Gildersleeve-Neumann & Wright (2010) | Russian-English                      | USA            | 42                          | 3;3-5;7 years                       | -         | V, C                        | TD |
| 18. | Spanish-English   | Brice et al. (2009)                  | English and Spanish                  | USA            | 16                          | 4–5 years                           | -         | C                           | TD |
| 19. | Spanish-English   | Fabiano & Goldstein (2005)           | English and Spanish                  | USA            | 3                           | 5;0 years<br>6;2 years<br>7;0 years | -         | C, PCC, language            | TD |
| 20. | Spanish-English   | Fabiano & Goldstein (2010)           | English and Spanish                  | USA/Mexico?    | 24                          | 3;0-4;0 years                       | -         | C                           | TD |
| 21. | Spanish-English   | Fabiano-Smith & Barlow (2010)        | English and Spanish                  | USA            | 24                          | 3–4 years                           | -         | C                           | TD |

|     |                                 |                                    |                                 |           |    |                             |   |                                  |     |
|-----|---------------------------------|------------------------------------|---------------------------------|-----------|----|-----------------------------|---|----------------------------------|-----|
| 22. | Spanish-English                 | Gildersleeve-Neumann et al. (2008) | English                         | USA       | 33 | 3;1–3;10 years              | - | C, V                             | TD  |
| 23. | Spanish-English                 | Goldstein & Washington (2001)      | English and Spanish             | USA       | 12 | 4;0–4;11 years              | - | C, PCC, PhonP                    | TD  |
| 24. | Spanish-English                 | Goldstein & Fabiano (2005)         | English and Spanish             | USA       | 15 | 5;0–5;5 years               | - | C, PhonP, etc.                   | TD  |
| 25. | Spanish-English                 | Ruiz-Felter et al. (2016)          | English and Spanish             | USA       | 91 | 5;6 years (Mean)            | - | C, V, PCC, PVC, intell           | TD  |
| 26. | Spanish-English                 | Yavaş (2010)                       | English                         | USA       | 30 | 3;6–7;1 years               | - | CC                               | SSD |
| 27. | Spanish-English                 | Yavas & Someillan (2005)           | English                         | USA       | 15 | 3;3–3;7 years               | - | CC                               | TD? |
| 28. | Spanish-English                 | Yavaş & Barlow (2006)              | English                         | USA       | 40 | 2;11–4;5 years              | - | CC                               | TD  |
| 29. | Spanish, Mandarin and Taiwanese | Yang & Hua (2010)                  | Spanish, Mandarin and Taiwanese | Paraguay? | 1  | 15-24 months                | - | C, V, PCC, PVC, PPC, PhonP error | TD  |
| 30. | Tagalog-Spanish-English         | Montanari (2011)                   | Tagalog, Spanish and English    | USA       | 1  | 1;3–1;10 years longitudinal | - | C                                | TD  |
| 31. | Vietnamese-English              | McLeod et al. (2022)               | Vietnamese and English          | Australia | 5  | 2                           | 3 | C, PCC, PVC, PTC                 | TD  |
| 32. | Welsh-English                   | Munro et al. (2005)                | Welsh and English               | Wales     | 81 | 2;6–5;0                     | - | C                                | TD  |

**Note.** C = consonant; V = vowel; PCC = percentage of consonants correct; PVC = percentage of vowels correct; PTC = percentage of tones correct; PhonP = phonological processes; TD = typically developing; SSD = speech sound disorder; (SSD) = possibly included children with SSD.

## References

- Baker, W., & Trofimovich, P. (2005). Interaction of native-and second-language vowel system (s) in early and late bilinguals. *Language and Speech*, 48 (1), 1–27. <https://doi.org/10.1177/00238309050480010101>
- Brice, A. E., Carson, C. K., & O'Brien, J. D. (2009). Spanish-English articulation and phonology of 4- and 5-year-old preschool children: An initial investigation. *Communication Disorders Quarterly*, 31(1), 3–14. <https://doi.org/10.1177/1525740108327447>
- Brulard, I., & Carr, P. (2003). French-English bilingual acquisition of phonology: One production system or two? *International Journal of Bilingualism*, 7(2), 177–202. <https://doi.org/10.1177/13670069030070020401>
- En, L. G. W., Brebner, C., & McCormack, P. (2014). A preliminary report on the English phonology of typically developing English-Mandarin bilingual preschool Singaporean children. *International Journal of Language and Communication Disorders*, 49(3), 317–332. <https://doi.org/10.1111/1460-6984.12075>
- Fabiano-Smith, L., & Barlow, J. A. (2010). Interaction in bilingual phonological acquisition: evidence from phonetic inventories. *International Journal of Bilingual Education and Bilingualism*, 13(1), 81–97. <https://doi.org/10.1080/13670050902783528>
- Fabiano-Smith, L., & Goldstein, B. A. (2010). Phonological acquisition in bilingual Spanish-English speaking children. *Journal of Speech, Language, and Hearing Research*, 53(1), 160–178. [https://doi.org/10.1044/1092-4388\(2009/07-0064\)](https://doi.org/10.1044/1092-4388(2009/07-0064))
- Fabiano, L., & Goldstein, B. (2005). Phonological cross-linguistic effects in bilingual Spanish-English speaking children. *Journal of Multilingual Communication Disorders*, 3(1), 56–63. <https://doi.org/10.1080/14769670400027316>
- Gildersleeve-Neumann, C. E., & Wright, K. L. (2010). English speech acquisition in 3-to 5-year-old children learning Russian and English. *Language, Speech, and Hearing Services in Schools*, 41, 429–444. [https://doi.org/10.1044/0161-1461\(2009/09-0059\)](https://doi.org/10.1044/0161-1461(2009/09-0059))
- Gildersleeve-Neumann, C. E., Kester, E. S., Davis, B. L., & Peña, E. D. (2008). English speech sound development in preschool-aged children from bilingual English– Spanish environments. *Language, Speech, and Hearing Services in Schools*, 39(3), 314–328. [https://doi.org/10.1044/0161-1461\(2008/030\)](https://doi.org/10.1044/0161-1461(2008/030))
- Goldstein, B. A., Fabiano, L., & Washington, P. S. (2005). Phonological skills in predominantly English-speaking, predominantly Spanish-speaking, and Spanish-English bilingual children. *Language, Speech, and Hearing Services in Schools*, 36, 201–218.
- Goldstein, B., & Washington, P. S. (2001). An initial investigation of phonological patterns in typically developing 4-year-old Spanish-English bilingual children. *Language, Speech, and Hearing Services in Schools*, 32(3), 153–164. [https://doi.org/10.1044/0161-1461\(2001/014\)](https://doi.org/10.1044/0161-1461(2001/014))

- Holm, A., & Dodd, B. (1999a). A longitudinal study of the phonological development of two Cantonese-English bilingual children. *Applied Psycholinguistics*, 20(3), 349–376. <https://doi.org/10.1017/S0142716499003021>
- Holm, A., & Dodd, B. (1999b). Differential diagnosis of phonological disorder in two bilingual children acquiring Italian and English. *Clinical Linguistics and Phonetics*, 13(2), 113–129. <https://doi.org/10.1080/026992099299185>
- Johnson, C. E., & Lancaster, P. (1998). The development of more than one phonology: A case study of a Norwegian-English bilingual child. *International Journal of Bilingualism*, 2(3), 265–300. <https://doi.org/10.1177/136700699800200302>
- Keshavarz, M. H., & Ingram, D. (2002). The early phonological development of a Farsi-English bilingual child. *International Journal of Bilingualism and Bilingual Education*, 6, 255–269. <https://doi.org/10.1177/13670069020060030301>
- Kim, J. H., Ballard, E., & McCann, C. (2018). Age-related changes in segmental accuracy and error production in Korean-English bilingual children: implications for clinical speech sound assessment procedures. *Speech, Language and Hearing*, 21(1), 41–54. <https://doi.org/10.1080/2050571X.2017.1323700>
- Kpogo, F., & Gathercole, V. C. M. (2020). The influence of native English-speaking environment on Akan-English bilinguals' production of English inter-dental fricatives. *International Journal of Bilingualism*, 24(4), 559–571. <https://doi.org/10.1177/1367006919844032>
- Lin, L.-C., & Johnson, C. J. (2010). Phonological patterns in Mandarin-English bilingual children. *Clinical Linguistics and Phonetics*, 24(4-5), 369–386. <https://doi.org/10.3109/02699200903532482>
- McLeod, S., Margetson, K., Wang, C., Tran, V. H., Verdon, S., White, K., & Pham, B. (2022). Speech acquisition within a 3-generation Vietnamese-English family: The influence of maturation and ambient phonology. *Clinical Linguistics and Phonetics*, 36(4-5), 470–493. <https://doi.org/10.1080/02699206.2020.1862915>
- Montanari, S. (2011). Phonological differentiation before age two in a Tagalog-Spanish-English trilingual child. *International Journal of Multilingualism*, 8(1), 5–21.
- Munro, S., Ball, M. J., Müller, N., Duckworth, M., & Lyddy, F. (2005). Phonological acquisition in Welsh-English bilingual children. *Journal of Multilingual Communication Disorders*, 3(1), 24–49. <https://doi.org/10.1080/14769670410001683467>
- Pascoe, M., Mahura, O., & Le Roux, J. (2018). South African English speech development: Preliminary data from typically developing preschool children in Cape Town. *Clinical Linguistics and Phonetics*, 32(12), 1145–1161. <https://doi.org/10.1080/02699206.2018.1510985>
- Phoon, H. S., Abdullah, A. C., & Maclagan, M. (2012). The effect of dialect on the phonological analysis of Chinese-influenced Malaysian English speaking children. *International Journal of Speech-Language Pathology*, 14(6), 487–498. <https://doi.org/10.3109/17549507.2012.719549>
- Preston, J. L., & Seki, A. (2011). Identifying residual speech sound disorders in bilingual children: A Japanese-English case study. *American Journal of Speech-Language Pathology*, 20(2), 73–85. [https://doi.org/10.1044/1058-0360\(2011/10-0057\)](https://doi.org/10.1044/1058-0360(2011/10-0057))
- Ruiz-Felter, R., Cooperson, S. J., Bedore, L. M., & Peña, E. D. (2016). Influence of current input-output and age of first exposure on phonological acquisition in early bilingual Spanish-English-speaking kindergarteners. *International Journal of Language and Communication Disorders*, 51(4), 368–383. <https://doi.org/10.1111/1460-6984.12214>

- Sabri, M., & Fabiano-Smith, L. (2018). Phonological development in a Bilingual Arabic-English-speaking child with bilateral cochlear implants: A longitudinal case study. *American Journal of Speech-Language Pathology*, 27(4), 1506–1522. [https://doi.org/10.1044/2018\\_AJSLP-17-0162](https://doi.org/10.1044/2018_AJSLP-17-0162)
- Yang, H.-Y., & Zhu Hua. (2010). The phonological development of a trilingual child: Facts and factors. *International Journal of Bilingualism*, 14(1), 105-126. <https://doi.org/10.1177/1367006909356650>
- Yavaş, M. (2010). Acquisition of /s/-clusters in Spanish-English bilingual children with phonological disorders. *Clinical Linguistics and Phonetics*, 24(3), 188–198. <https://doi.org/10.3109/02699200903362919>
- Yavaş, M., & Barlow, J. A. (2006). Acquisition of #sC clusters in Spanish-English bilingual children. *Journal of Multilingual Communication Disorders*, 4(3), 182–193. <https://doi.org/10.1080/14769670601110499>
- Yavaş, M., & Beaubrun, C. (2006). Acquisition of #sC clusters in Haitian Creole-English bilingual children. *Journal of Multilingual Communication Disorders*, 4(3), 194–204. <https://doi.org/10.1080/14769670601110515>
- Yavas, M., & Someillan, M. (2005). Patterns of acquisition of /s/-clusters in Spanish-English bilinguals. *Journal of Multilingual Communication Disorders*, 3(1), 50–55. <https://doi.org/10.1080/14769670400018323>
