# Supplementary material
Source: publisher figshare collection journal article supplement (https://asha.figshare.com/articles/dataset/_/23290055)
Supplement: Supplementary file 2 [file 1]

## Supplemental Material S2. Similarities and differences between Vietnamese dialects (informed by Phạm & McLeod, 2016).

### Northern Vietnamese

Northern Vietnamese has 20 syllable-initial consonants /p, b, t̚, t, d, (t), c, k, [ʔ], m, n, ɲ, (r), f, v, s (ʃ), z (ʒ), x, ɣ, h, (t͡s), l/, two semivowels /w, j/, and ten syllable-final consonants /p, t, c, k, (kʰ), m, n, ɲ, ɲ, (ɲᵐ)/ (Cao, 2006; Đỗ & Lê, 2005; Đoàn, 2003; Hoàng, 2004; Huỳnh, 2014; Kirby, 2011; Phạm & McLeod, 2016, 2019). Northern Vietnamese has 11 vowels /i, e, ɛ, ʊ, u, o, ɔ, ʌ, ɤ, ɔ̃, ɔ̃/ and three diphthongs /ie, uo, ʊɤ/. Six short vowels (/ĩ, ẽ, ẽ, ỹ, ỹ, ỹ/) are included by some authors in some literature (Cao, 2006; Đoàn, 2003). The six tones are the same as for the standard dialects.

### Central Vietnamese

Central Vietnamese has 23 syllable-initial consonants /p, b, t̚, t, d, t, c, k, [ʔ], m, n, ɲ, ɲ, f, v, s, z, ʃ, ʒ, x, ɣ, h, l/, two semivowels /w, j/, and 10 syllable-final consonants /p, t, c, k, (kʰ), m, n, ɲ, ɲ, (ɲᵐ)/ (Đình & Nguyễn, 1998; Hoàng, 2004; Huỳnh, 1999; Phạm & McLeod, 2016). There are nine long singleton vowels /i, e, ɛ, ʊ, u, o, ɔ, ʌ, a/, three diphthongs /ie, uo, ʊɤ/ (Cao, 2006; Hoàng, 2004), and five tones: (1) level (*thanh không dấu* or *thanh ngang*), (2) falling (*thanh huyền*), (4) dipping-rising (*thanh hỏi*), (5) rising (*thanh sắc*), and (6) constricted (*thanh nặng*) (Đoàn, 2003; Hoàng, 2004; Huỳnh, 1999, 2014; Kirby, 2011; Phạm & McLeod, 2016; Tang & Barlow, 2006; Vu, 1982).

### Southern Vietnamese

Southern Vietnamese has 21 syllable-initial consonants /b, t̚, t, d, t, c, k, m, n, ɲ, ɲ, f, z (j), ʃ, ʒ, x, ɣ, h, l, w/, two semivowels /w, j/, and six to eight syllable-final consonants /p, k, (kʰ), m, n, ɲ, (ɲᵐ)/ (Hoàng, 2004; Huỳnh, 2014; Phạm & McLeod, 2016; Tang & Barlow, 2006). It has nine long singleton vowels /i, e, ɛ, ʊ, u, o, ɔ, ʌ, a/, three short singleton vowels /ă, ɤ̃, ɔ̃/, and three diphthongs /ie, uo, ʊɤ/. Its five tones are: (1) level (*thanh không dấu* or *thanh ngang*), (2) falling (*thanh huyền*), (3-4) creaky dipping-rising (*thanh ngã hỏi*), (5) rising (*thanh sắc*), and (6) constricted (*thanh nặng*) (Đoàn, 2003; Hoàng, 2004; Huỳnh, 1999, 2014; Kirby, 2011; Phạm & McLeod, 2016; Tang & Barlow, 2006; Vu, 1982).
