# Supplementary material
Source: publisher figshare collection journal article supplement (https://asha.figshare.com/articles/dataset/_/23290055)
Supplement: Supplementary file 3 [file 1]

**Supplemental Material S3.** Cluster characteristics and cluster comparisons on Vietnamese and English language proficiency for children ( $n = 62$ ) and adults ( $n = 77$ ) in the English sample.

| Children               | High Proficiency      | Low Proficiency     | English Proficient |                                     |        |         |                     |
|------------------------|-----------------------|---------------------|--------------------|-------------------------------------|--------|---------|---------------------|
|                        | 1                     | 2                   | 3                  |                                     |        |         |                     |
| Variable               | ( $n = 24$ )          | ( $n = 16$ )        | ( $n = 22$ )       | $F$                                 | $p$    | $h_p^2$ | Cluster comparisons |
| Vietnamese proficiency | 0.92                  | -0.45               | -0.60              | <i>Welch's F</i> (2, 32.07) = 49.15 | < .001 | .55     | 1 > 2; 1 > 3        |
| English proficiency    | 0.49                  | -1.18               | 0.62               | $F$ (2, 59) = 58.74                 | < .001 | .67     | 1 > 2; 3 > 2        |
| Adults                 | Vietnamese Proficient | Similar Proficiency | English Proficient |                                     |        |         |                     |
|                        | 1                     | 2                   | 3                  |                                     |        |         |                     |
| Variable               | ( $n = 33$ )          | ( $n = 36$ )        | ( $n = 8$ )        | $F$                                 | $p$    | $h_p^2$ | Cluster comparisons |
| Vietnamese proficiency | 0.18                  | 0.45                | -2.79              | <i>Welch's F</i> (2, 15.54) = 86.88 | < .001 | .88     | 2 > 1 > 3           |
| English proficiency    | -0.72                 | 0.71                | 1.01               | <i>Welch's F</i> (2, 17.48) = 86.96 | < .001 | .69     | 1 < 2; 1 < 3        |

*Note.* Standardized mean responses are provided for Vietnamese and English language proficiency for each of the three clusters.
