# Supplementary material
Source: publisher figshare collection journal article supplement (https://asha.figshare.com/articles/dataset/_/23290055)

**Supplemental Material S4.** Standardized mean responses for Vietnamese and English language proficiency.

(a) Child Vietnamese Sample: Standardized Mean Responses for Vietnamese and English Language Proficiency for Each of the Three Clusters for Children (*n* = 61)

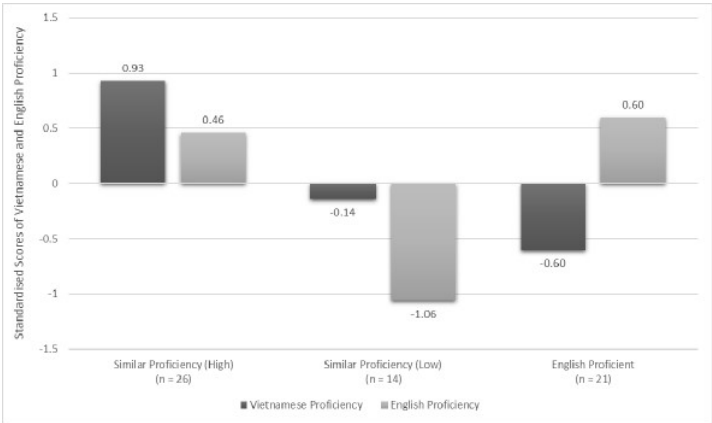

(b) Child English Sample: Standardized Mean Responses for Vietnamese and English Language Proficiency for Each of the Three Clusters for Children (*n* = 62)

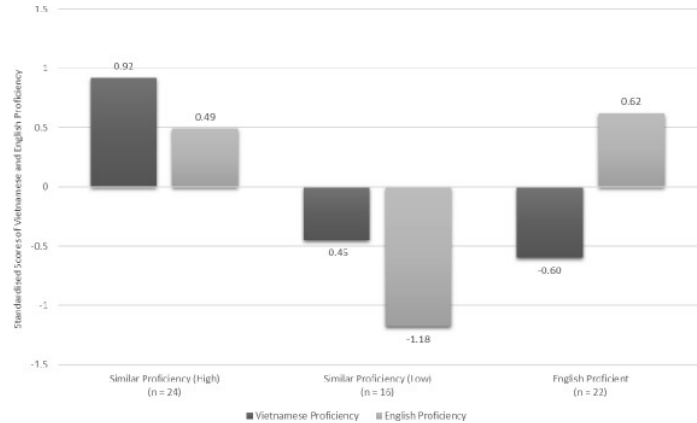

(c) Adult Vietnamese Sample: Standardized Mean Responses for Vietnamese and English Language Proficiency for Each of the Three Clusters for Adult Participants ( $n = 77$ )

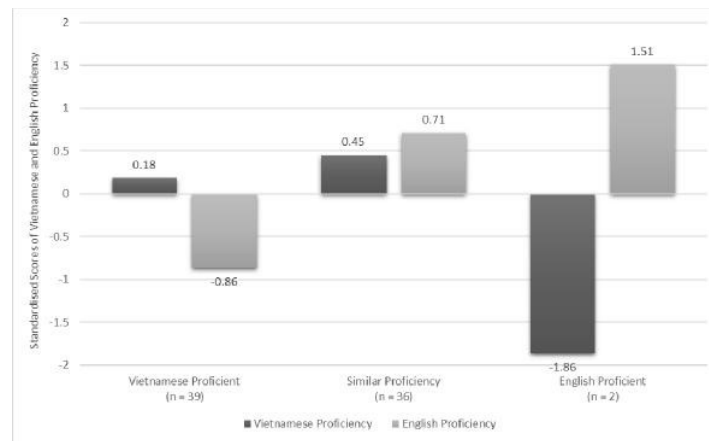

(d) Adult English Sample: Standardized Mean Responses for Vietnamese and English Language Proficiency for Each of the Three Clusters for Adult Participants ( $n = 77$ )

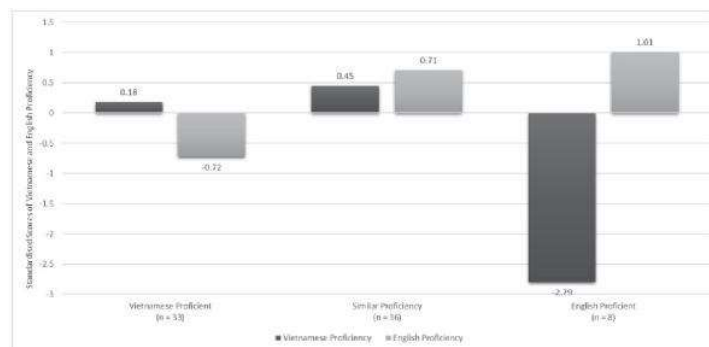

Supplement: Supplementary file 4 [file 1]
